# Supplementary material for: In situ study of strontium segregation in La0.6Sr0.4Co0.2Fe0.8O3−δ in ambient atmospheres using high-temperature environmental scanning electron microscopy
Source: Royal Society of Chemistry journal article supplement (doi:10.1039/c8ta01341a), 2018-01-01
Supplement: c8ta01341a1.pdf [file c8ta01341a1.pdf]

### Electronic Supplementary Information

#### **In-situ study of strontium segregation in $\text{La}_{0.6}\text{Sr}_{0.4}\text{Co}_{0.2}\text{Fe}_{0.8}\text{O}_{3-\delta}$ in ambient atmospheres using High-Temperature Environmental Scanning Electron Microscopy**

Mathew Niania,<sup>a</sup> Renaud Podor,<sup>c</sup> T. Ben Britton,<sup>a</sup> Cheng Li,<sup>a</sup> Samuel J. Cooper,<sup>b</sup> Nikolai Svetkov,<sup>d</sup> Stephen Skinner,<sup>a</sup> and John Kilner<sup>a</sup>

<sup>a</sup> Department of Materials, Imperial College London, London, SW7 2BP, UK

<sup>b</sup> Dyson School of Design Engineering, Imperial College London, London, SW7 2AZ

<sup>c</sup> ICSM, CEA, CNRS, ENSCM, Univ Montpellier, Marcoule, France

<sup>d</sup> Laboratory for Electrochemical Interfaces, Department of Nuclear Science and Engineering, Massachusetts Institute of Technology, 77 Massachusetts Avenue, Cambridge, Massachusetts 02139, United States

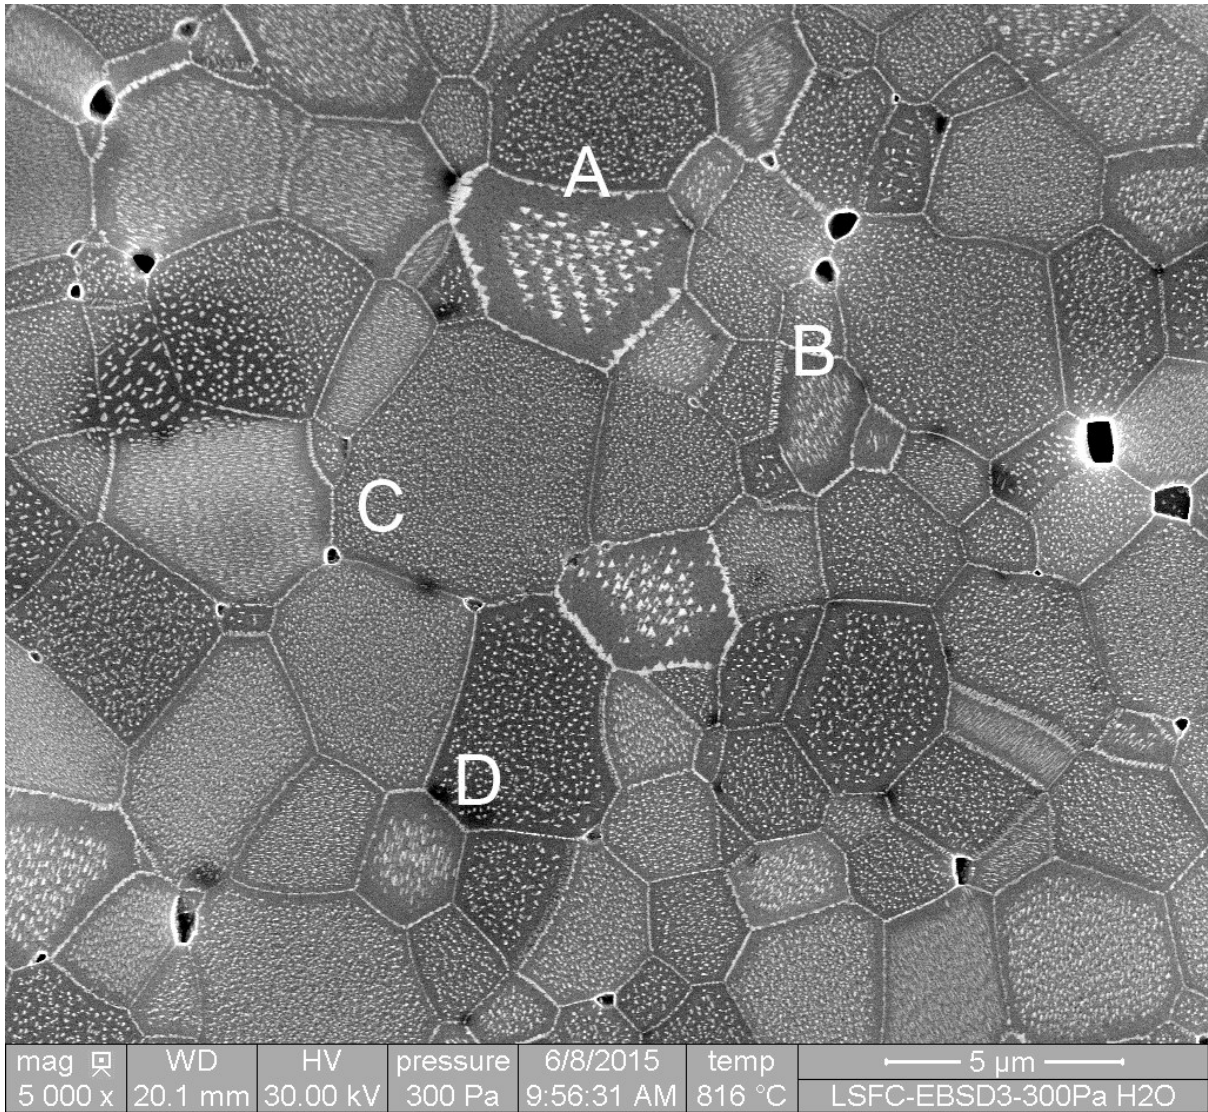

**Fig. S1** HT-ESEM micrograph of the LSCF sample annealed at 3 mbar H<sub>2</sub>O (Grains A-D, 5000× resolution)

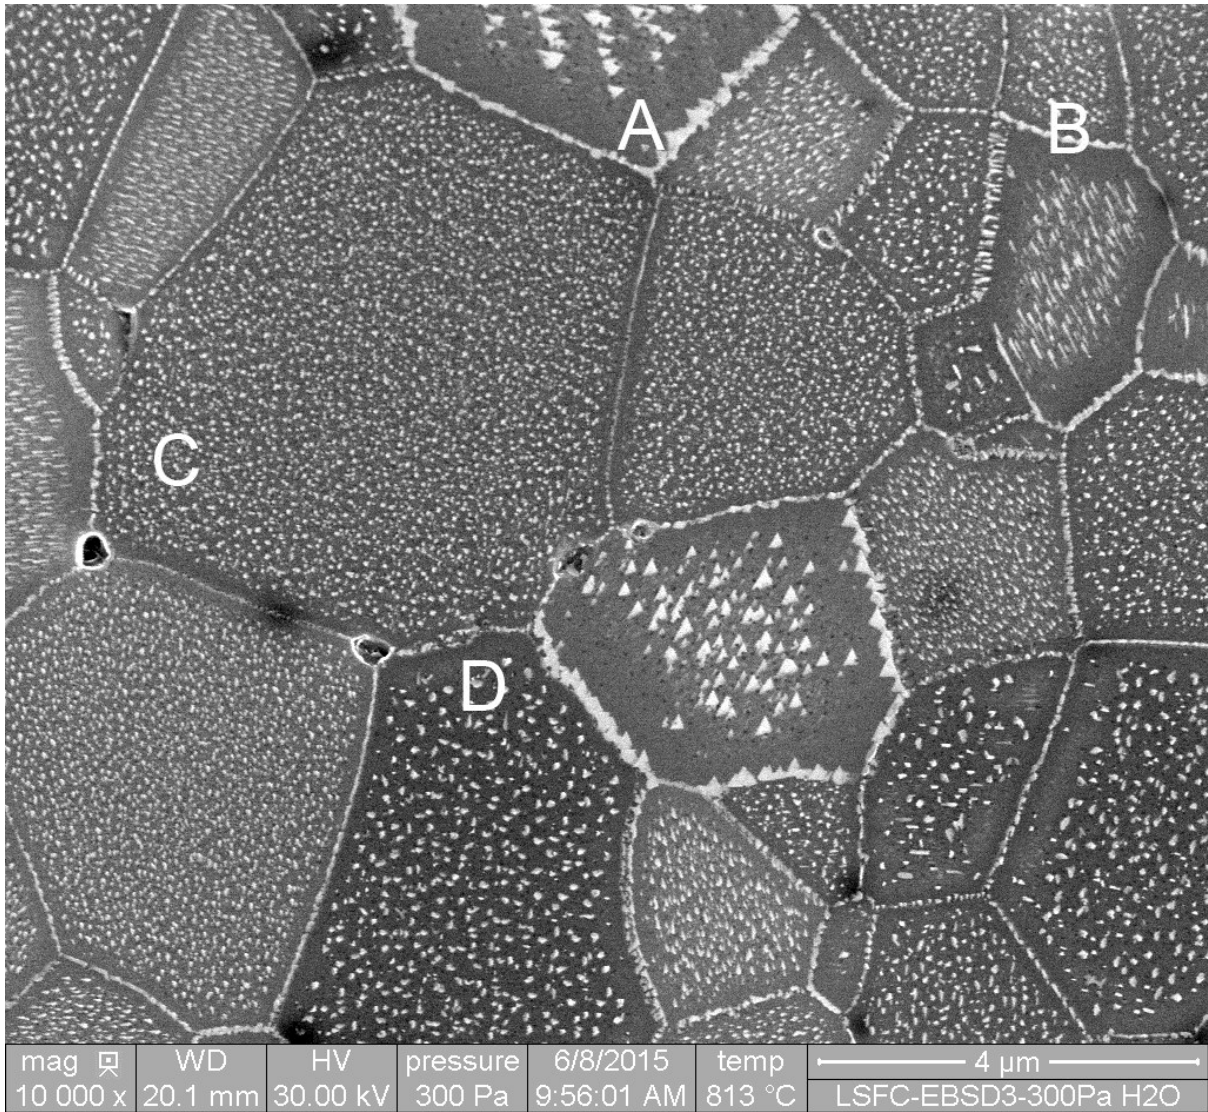

**Fig. S2** HT-ESEM micrograph of the LSCF sample annealed at 3 mbar H<sub>2</sub>O (Grains A-D, 5000× resolution)
